# Supplementary material
Source: PubMed Central journal article supplement (PMC5402618)
Supplement: NIHMS858061-supplement-1.pdf [file NIHMS858061-supplement-1.pdf]

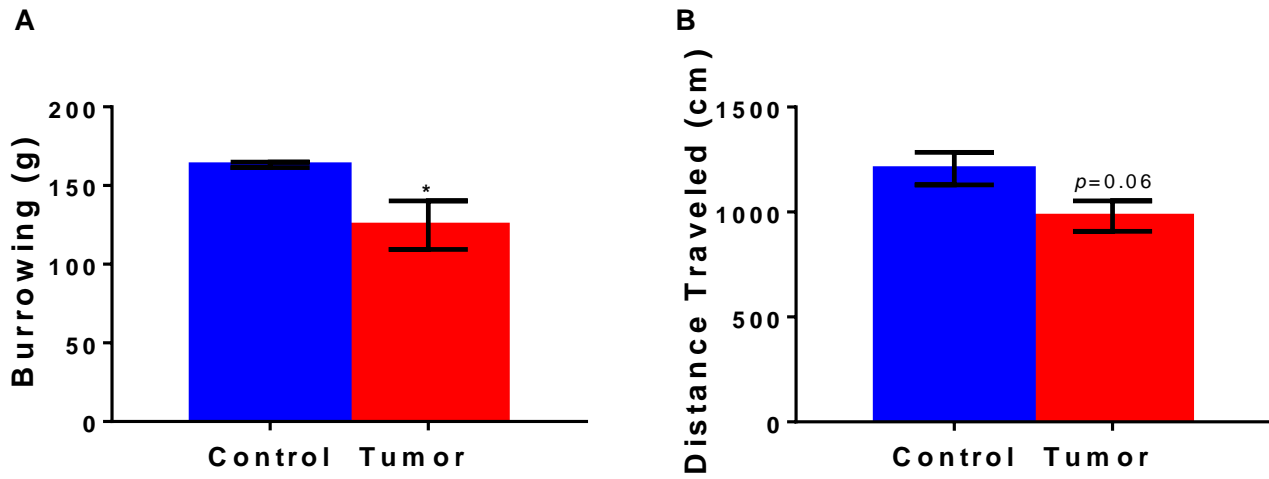

**Supplemental Fig 1. Tumor-bearing mice showed behavioral deficits.** Tumor-bearing mice showed a reduction in burrowing on day 27 post tumor implantation ( $p<0.05$ ) and a trend toward a reduction in overall locomotor activity on day 25 post tumor implantation ( $p=0.06$ ).  $n= 6-7$  mice/group.

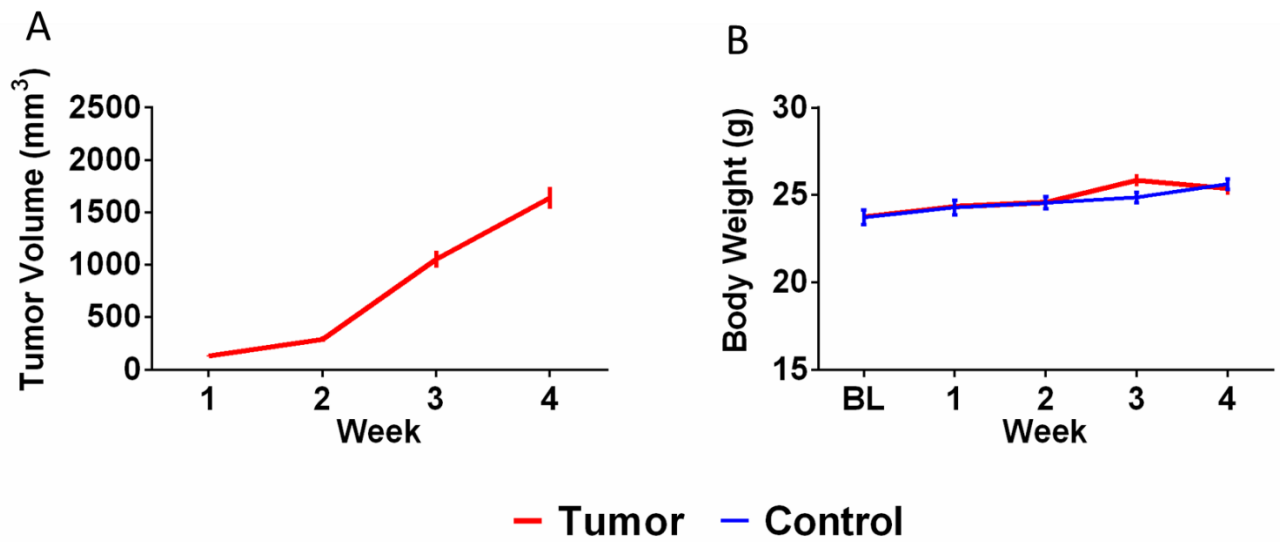

**Supplemental Fig 2. Tumor growth and body weight followed anticipated patterns.** The tumor growth followed the expected trajectory (A) and did not result in weight loss (B). n=12 mice/group.

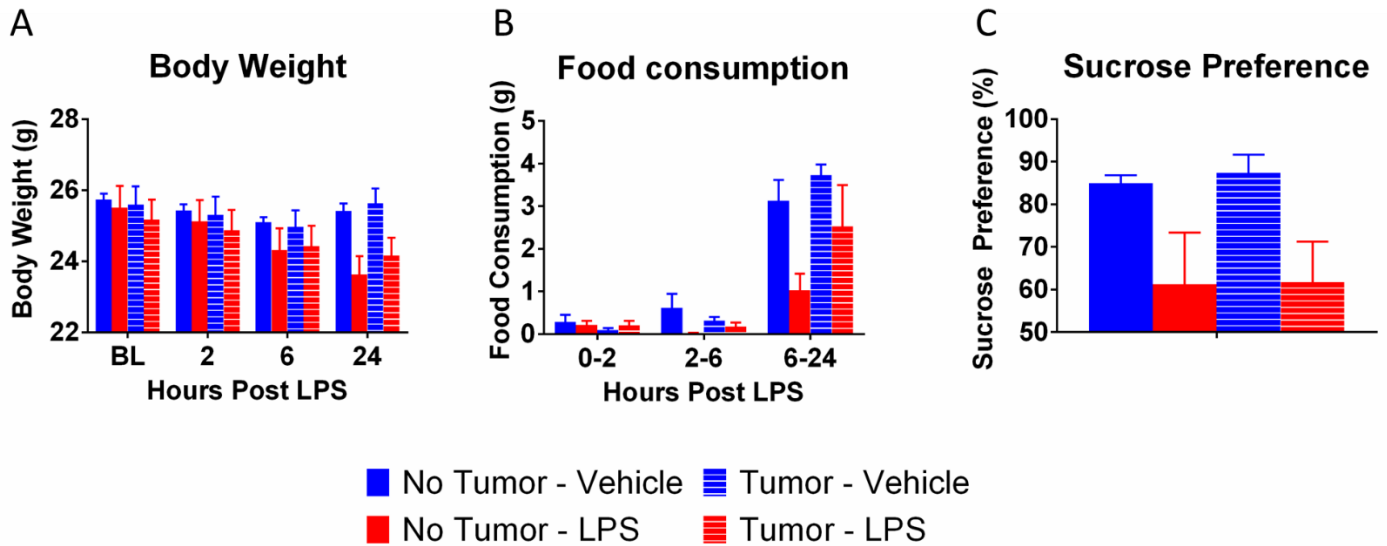

**Supplemental Fig 3. The effect of LPS on body weight, food consumption, and sucrose preference was not altered in tumor-bearing mice.** Weight loss was observed 24h after LPS treatment in both the tumor and non-tumor bearing mice (A). There was also a significant main effect of LPS on food consumption in the first 24 h (B) and sucrose preference between 6-22 h post-LPS (C), with no significant modulation by the tumor. n=6 mice/group.
